# Supplementary material for: PPEGMEMA-based cationic copolymers designed for layer-by-layer assembly
Source: Royal Society of Chemistry journal article supplement (doi:10.1039/c9ra05464b), 2019-01-01
Supplement: c9ra05464b1.pdf [file c9ra05464b1.pdf]

Supporting Information for

**PPEGMEMMA-based Cationic Copolymers Designed for Layer-by-Layer Assembly**

Tao Jiang, Saeed Zajforoushan Moghaddam, Esben Thormann\*

Department of Chemistry, Technical University of Denmark, 2800 Kgs. Lyngby,  
Denmark

---

\*Corresponding author contact: [esth@kemi.dtu.dk](mailto:esth@kemi.dtu.dk), +45 4525-2439

## S1 Characterization of P(PPEGMEMA-*stat*-AMA) Copolymers

### S1.1 $^1\text{H}$ NMR spectra of s-PPEGMEMA and l-PPEGMEMA

The  $^1\text{H}$  NMR spectra of all three synthesized copolymers were measured to characterize the three PPEGMEMA copolymers synthesized. A Bruker 400 MHz NMR spectrometer was used, with D<sub>2</sub>O as the solvent. The TopSpin software from Bruker was used to process the NMR data obtained. The NMR spectra of s-PPEGMEMA, m-PPEGMEMA and l-PPEGMEMA are presented in Figure S1, Figure 1 and Figure S2, respectively.

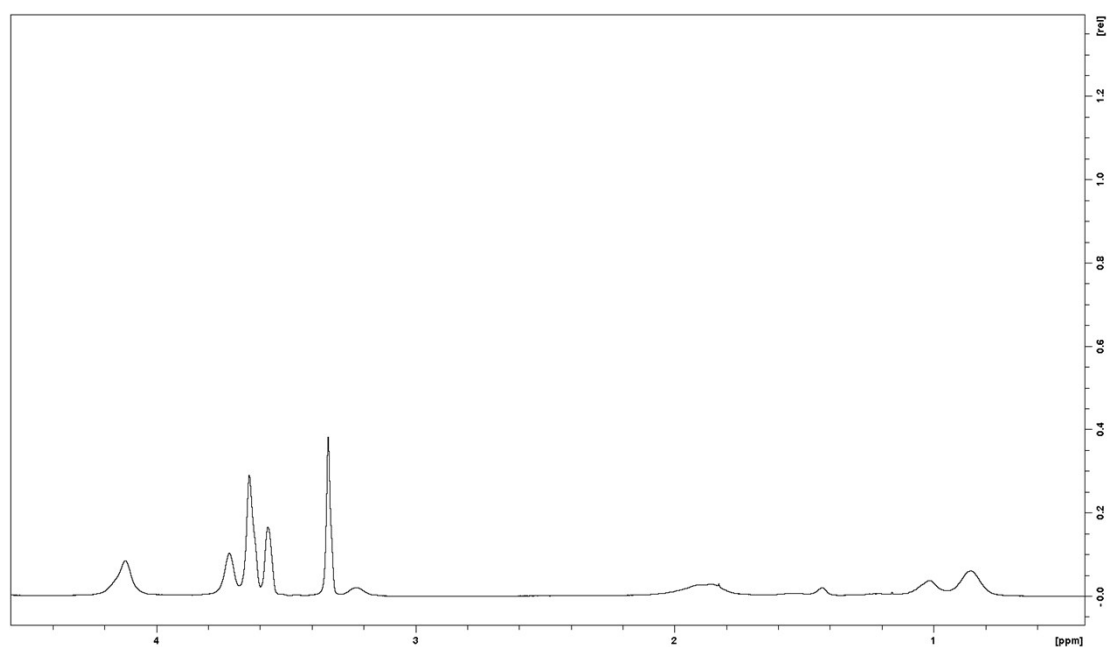

**Figure S1**  $^1\text{H}$  NMR spectrum of s-PPEGMEMA

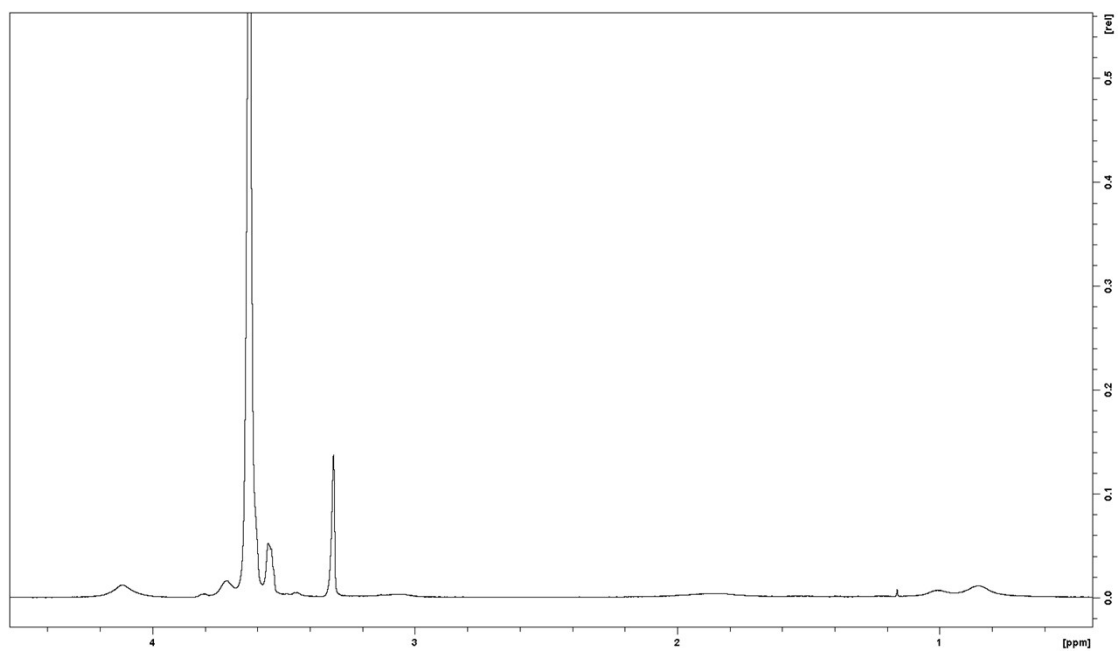

**Figure S2** <sup>1</sup>H NMR spectrum of l-PPEGMEMA

## S1.2 AF4 chromatograms of P(PEGMEMA-*stat*-AMA)

The molecular weight and polydispersity of the three P(PEGMEMA-*stat*-AMA) polymers were determined by AF4 with a Wyatt Eclipse instrument with UV (Agilent 1230 infinity, Agilent), refractive index (Optilab rex, 633 nm, Wyatt) and multi-angle light scattering (MALS) (Dawn Heleos-II, 662 nm, Wyatt) detectors. The Optilab RI detector was used to precisely determine the refractive index increment ( $dn/dc$ ) values of the three polymers. A concentration series of 0.05, 0.1, 0.25, 0.5 and 1 mg/ml were used and the corresponding dRI values were plotted and fitted linearly. The slope was calculated as the  $dn/dc$  value and accurate MW were calculated accordingly.

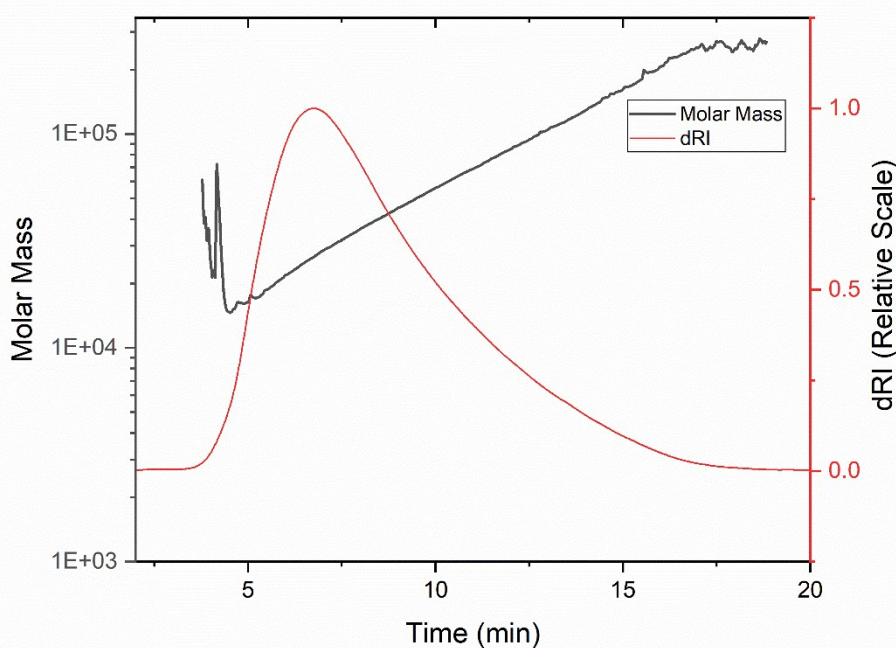

Figure S3 AF4 chromatogram of s-PPEGMEMA

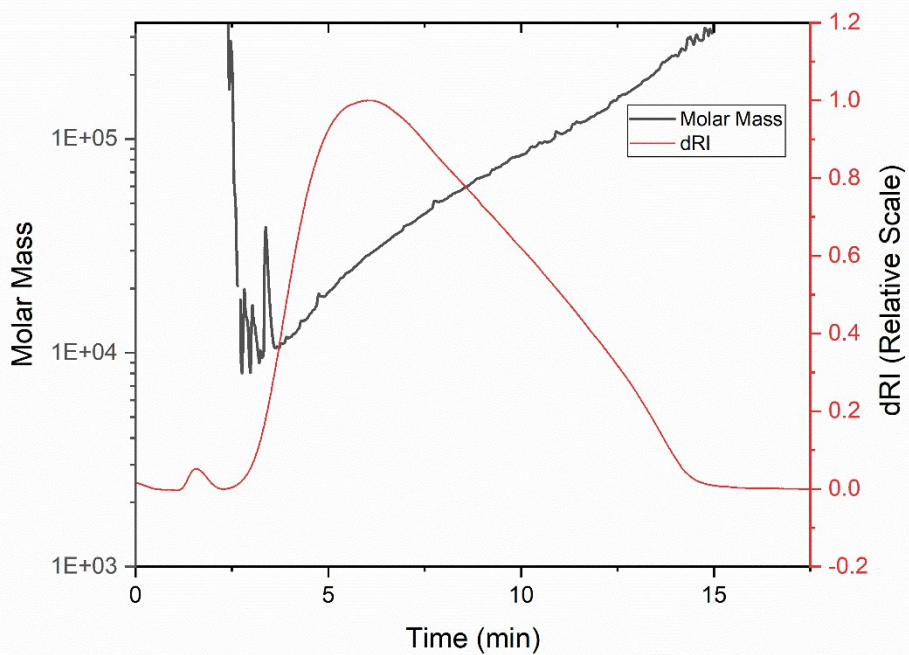

Figure S4 AF4 chromatogram of m-PPEGMEMA

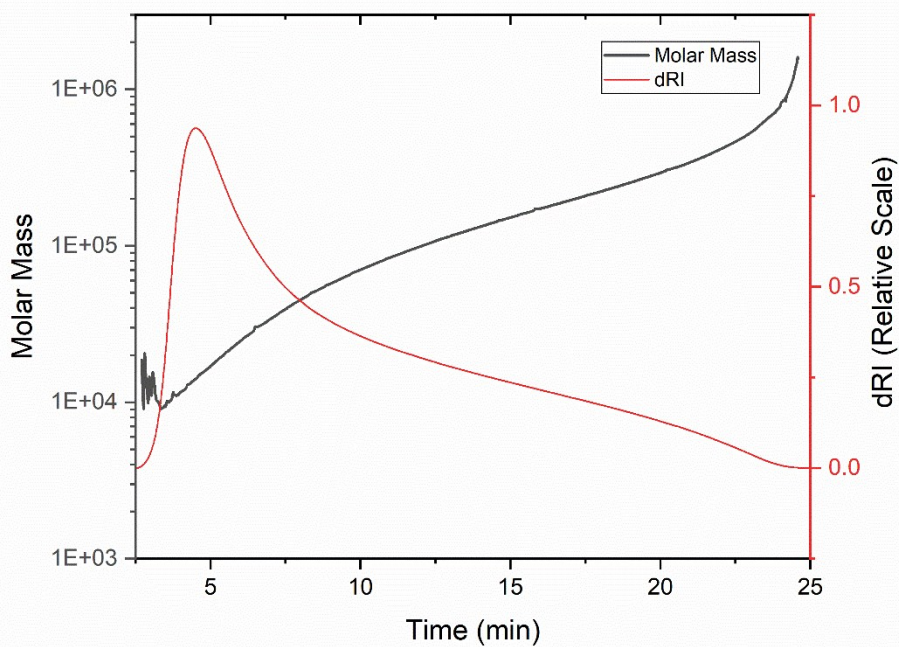

Figure S5 AF4 chromatogram of l-PPEGMEMA

## **S2 Estimation of Hydrated PPEGMEMA/alginate Multilayered Film Density**

The volume fraction of the solvent,  $f_s$ , in the PPEGMEMA/alginate multilayered film were estimated with the BEMA model from our ellipsometry data. The hydrated PPEGMEMA/alginate multilayered film density  $\rho_f$  was estimated according to the following equation:

$$\rho_f = \rho_s f_s + \rho_p (1 - f_s)$$

Where  $\rho_s$  and  $\rho_p$  are the densities of solvent and dry polymer, respectively. Herein  $\rho_s$  is 999 g/mL, and  $\rho_p$  is 1.4 g/cm<sup>3</sup>, estimated as an average of the polymer density of PEG (1.2 g/mL) and sodium alginate (1.6 g/cm<sup>3</sup>). The hydrated PPEGMEMA/alginate multilayered film density was finally calculated to be 1080 g/cm<sup>3</sup>, 1060 g/cm<sup>3</sup> and 1040 g/cm<sup>3</sup> for s-PPEGMEMA/alginate, m-PPEGMEMA/alginate and l-PPEGMEMA/alginate multilayered films, respectively.

## S3 Ellipsometry

### S3.1 Bare QCM sensor modelling

To reduce the number of layers that contribute to the optical properties of the QCM sensor substrate and simplify the modeling process, a tailor-made sensor (QSX335) with a thick opaque interlayer of titanium was used. The optical model for substrate then consists of a titanium substrate and a layer of silica. To avoid overparameterization, the thickness of silica coating was fixed as 25 nm, and only the optical constants of the titanium substrate was fitted with a B-Spline model (resolution 0.2 eV, parameterized initially from Ti optical constants from software library).

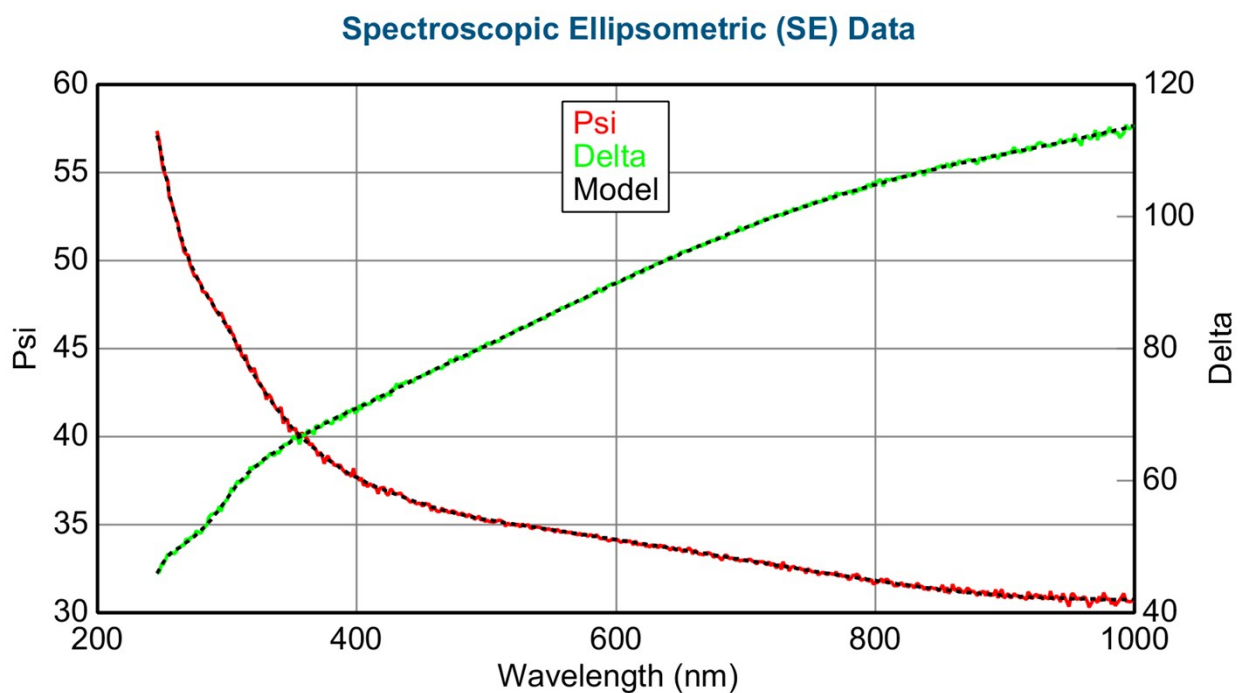

Figure S6 QCM bare sensor Psi and Delta in air with the fitted model described (dashed line)

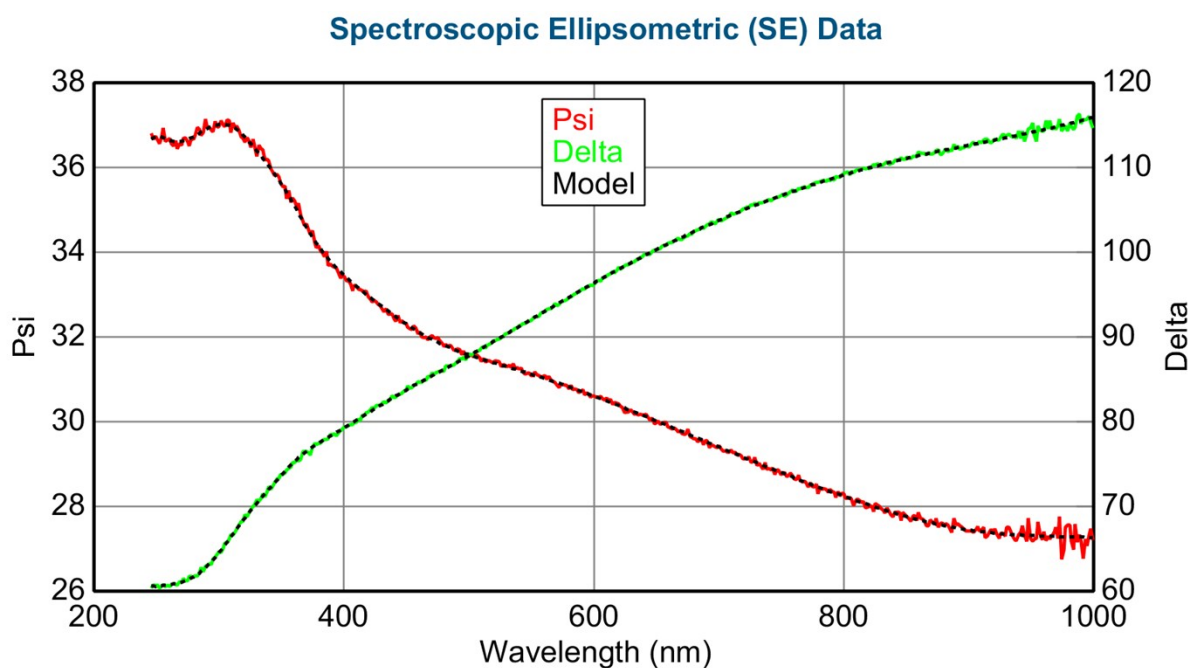

Figure S7 QCM bare sensor Psi and Delta in buffer with the fitted model described

### S3.2 Ellipsometry data modelling of PPEGMEMA/alginate multilayered film

As has been discussed in the Experimental section, the PPEGMEMA/alginate multilayered film was modeled with single-component Cauchy and two-component BEMA models. Detailed Psi and Delta spectra of all three PEM films are shown in Figure S8-13. The effect of several parameters such as surface roughness, grading, and thickness nonuniformity were tested, where only the latter was found to significantly improve the fitting quality and thus included in the model.



### Fit Results

MSE = 5.534  
Thickness # 2 =  $200.37 \pm 0.319$  nm  
A =  $1.361 \pm 0.00023801$   
B =  $0.00399 \pm 4.7385E-05$   
% Thickness Non-uniformity =  $77.33 \pm 0.533$

### Optical Model

- Layer # 2 = [Cauchy](#) Thickness # 2 = [200.37 nm](#) (fit)  
A = [1.361](#) (fit) B = [0.00399](#) (fit) C = [0.0000](#)  
+ **Urbach Absorption Parameters**  
Layer # 1 = [SiO2\\_JAW](#) Thickness # 1 = [25.00 nm](#)  
+ Substrate = [B-Spline](#)

### Spectroscopic Ellipsometric (SE) Data

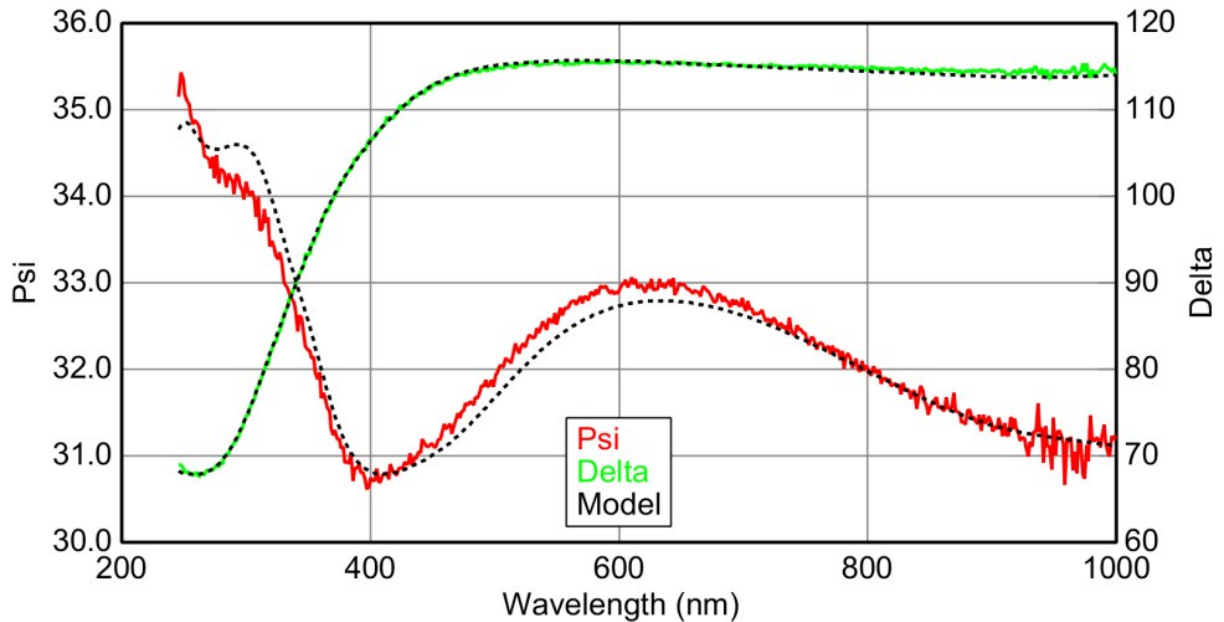

Figure S8 Ellipsometry data as well as the Cauchy modelling for s-PPEGMEMA/alginate multilayered film

### Fit Results

MSE = 5.998  
Thickness # 2 =  $198.62 \pm 0.285$  nm  
EMA % (Mat 2) =  $77.2 \pm 0.07$   
% Thickness Non-uniformity =  $77.56 \pm 0.611$

### Optical Model

- Layer # 2 = [EMA](#) Thickness # 2 = [198.62 nm](#) (fit)  
# of Constituents = [2](#)
- Material 1 = [Cauchy](#)  
A = [1.500](#) B = [0.00500](#) C = [0.0000](#)
- + **Urbach Absorption Parameters**  
Material 2 = [H2O\\_Pribil\\_25](#)  
EMA % (Mat 2) = [77.2](#) (fit)  
depolarization = [0.333](#) Analysis Mode = [Bruggeman](#)
- Layer # 1 = [SiO2\\_JAW](#) Thickness # 1 = [25.00 nm](#)
- + Substrate = [B-Spline](#)

### Spectroscopic Ellipsometric (SE) Data

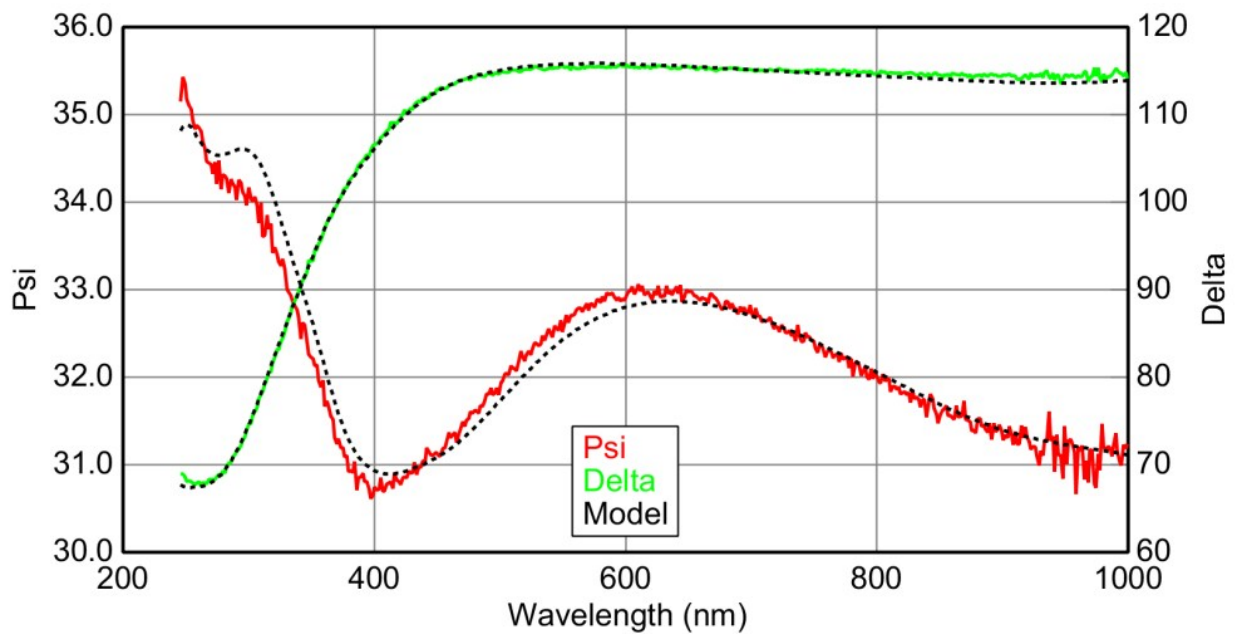

Figure S9 Ellipsometry data as well as the BEMA modelling for s-PPEGMEMA/alginate multilayered film

### Fit Results

MSE = 5.941  
Thickness # 2 =  $180.73 \pm 0.584$  nm  
A =  $1.349 \pm 0.00027572$   
B =  $0.00393 \pm 4.5621E-05$   
% Thickness Non-uniformity =  $100.00 \pm 1.117$

### Optical Model

- Layer # 2 = Cauchy Thickness # 2 = **180.73 nm** (fit)  
A = **1.349** (fit) B = **0.00393** (fit) C = **0.0000**
- + **Urbach Absorption Parameters**
- Layer # 1 = SiO2\_JAW Thickness # 1 = **25.00 nm**
- + Substrate = B-Spline

### Spectroscopic Ellipsometric (SE) Data

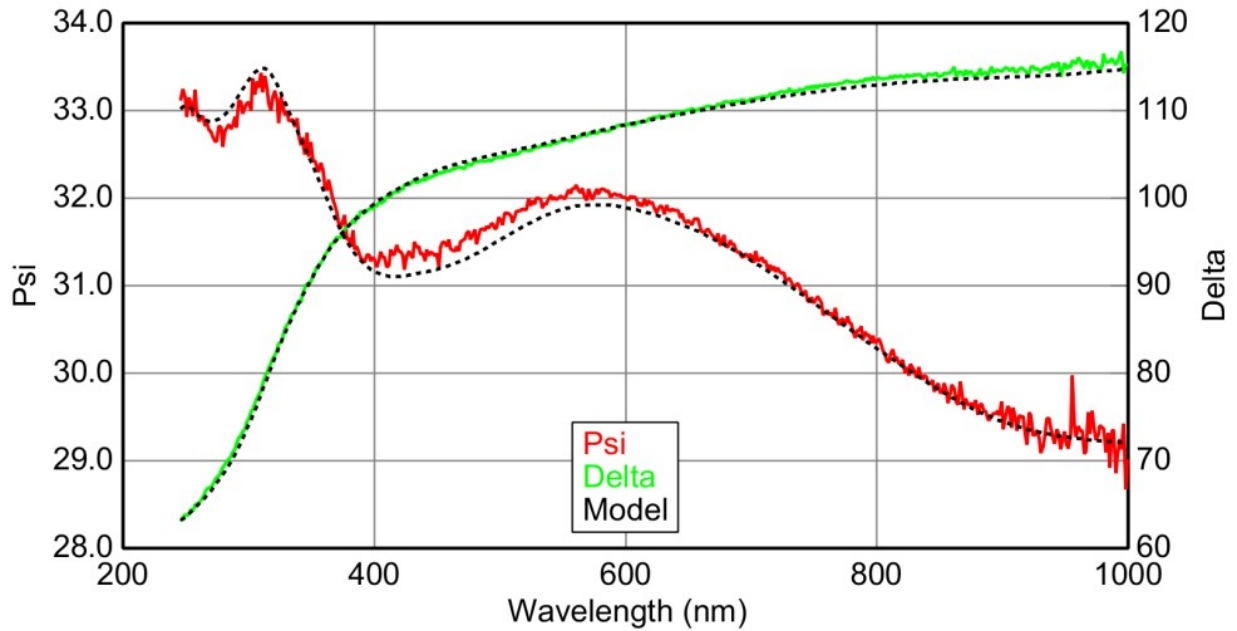

Figure S10 Ellipsometry data as well as the Cauchy modelling for m-PPEGMEMMA/alginate multilayered film

### Fit Results

MSE = 6.685  
Thickness # 2 =  $177.05 \pm 0.567$  nm  
EMA % (Mat 2) =  $83.3 \pm 0.09$   
% Thickness Non-uniformity =  $100.00 \pm 1.402$

### Optical Model

- Layer # 2 = [EMA](#) Thickness # 2 = [177.05 nm](#) (fit)  
# of Constituents = [2](#)
  - Material 1 = [Cauchy](#)  
A = [1.500](#) B = [0.00500](#) C = [0.0000](#)
  - + Urbach Absorption Parameters
- Material 2 = [H2O\\_Pribil\\_25](#)  
EMA % (Mat 2) = [83.3](#) (fit)  
depolarization = [0.333](#) Analysis Mode = [Bruggeman](#)
- Layer # 1 = [SiO2\\_JAW](#) Thickness # 1 = [25.00 nm](#)
- + Substrate = [B-Spline](#)

### Spectroscopic Ellipsometric (SE) Data

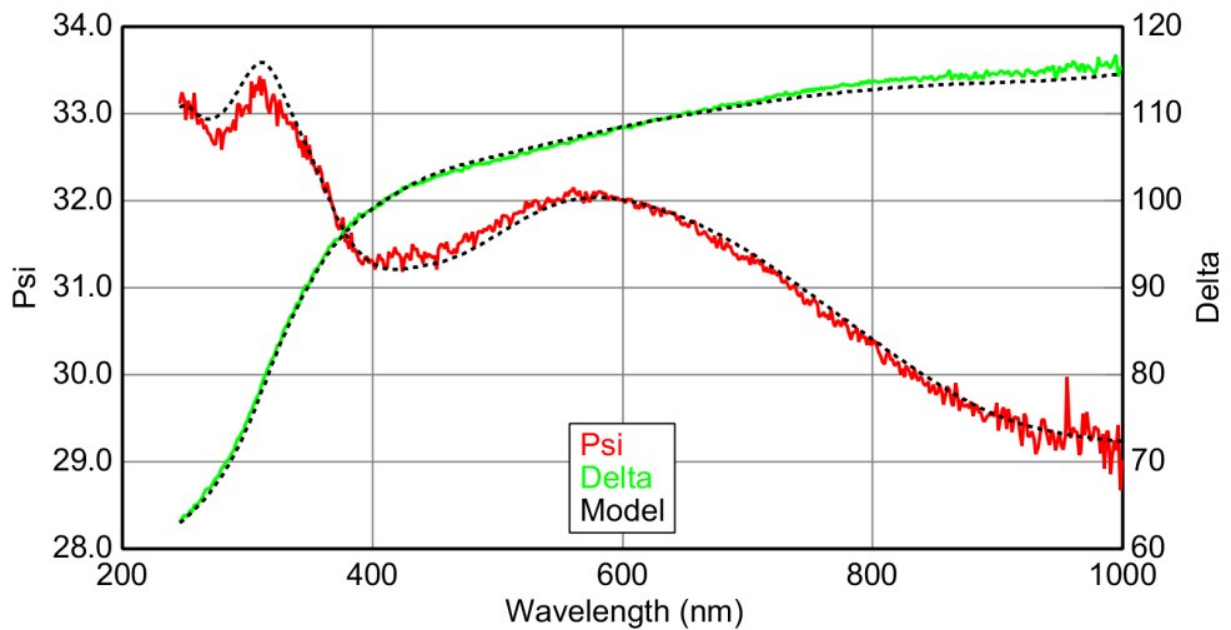

Figure S11 Ellipsometry data as well as the BEMA modelling for m-PPEGMEMA/alginate multilayered film

### Fit Results

MSE = 13.713  
Thickness # 2 =  $159.46 \pm 2.948$  nm  
A =  $1.337 \pm 0.00059798$   
B =  $0.00341 \pm 7.0185E-05$   
% Thickness Non-uniformity =  $100.00 \pm 8.130$

### Optical Model

- Layer # 2 = Cauchy Thickness # 2 = 159.46 nm (fit)  
A = 1.337 (fit) B = 0.00341 (fit) C = 0.0000
- + Urbach Absorption Parameters
- Layer # 1 = SiO2\_JAW Thickness # 1 = 25.00 nm
- + Substrate = B-Spline

### Spectroscopic Data At 305.787 min.

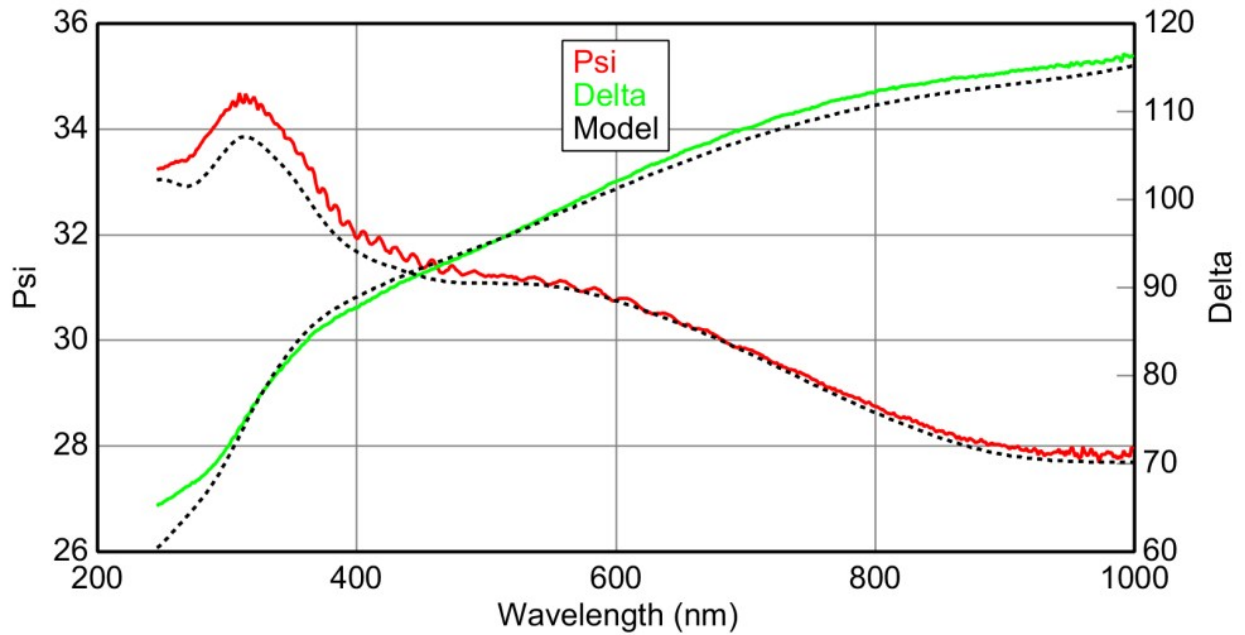

Figure S12 Ellipsometry data as well as the Cauchy modelling for I-PPEGMEMMA/alginate multilayered film

### Fit Results

MSE = 13.432  
Thickness # 2 =  $153.25 \pm 2.711$  nm  
EMA % (Mat 2) =  $91.4 \pm 0.22$   
% Thickness Non-uniformity =  $100.00 \pm 8.742$

### Optical Model

- Layer # 2 = [EMA](#) Thickness # 2 = [153.25 nm](#) (fit)  
# of Constituents = [2](#)
- Material 1 = [Cauchy](#)  
A = [1.500](#) B = [0.00500](#) C = [0.0000](#)
- + **Urbach Absorption Parameters**  
Material 2 = [H2O\\_Pribil\\_25](#)  
EMA % (Mat 2) = [91.4](#) (fit)  
depolarization = [0.333](#) Analysis Mode = [Bruggeman](#)
- Layer # 1 = [SiO2\\_JAW](#) Thickness # 1 = [25.00 nm](#)
- + Substrate = [B-Spline](#)

### Spectroscopic Data At 305.787 min.

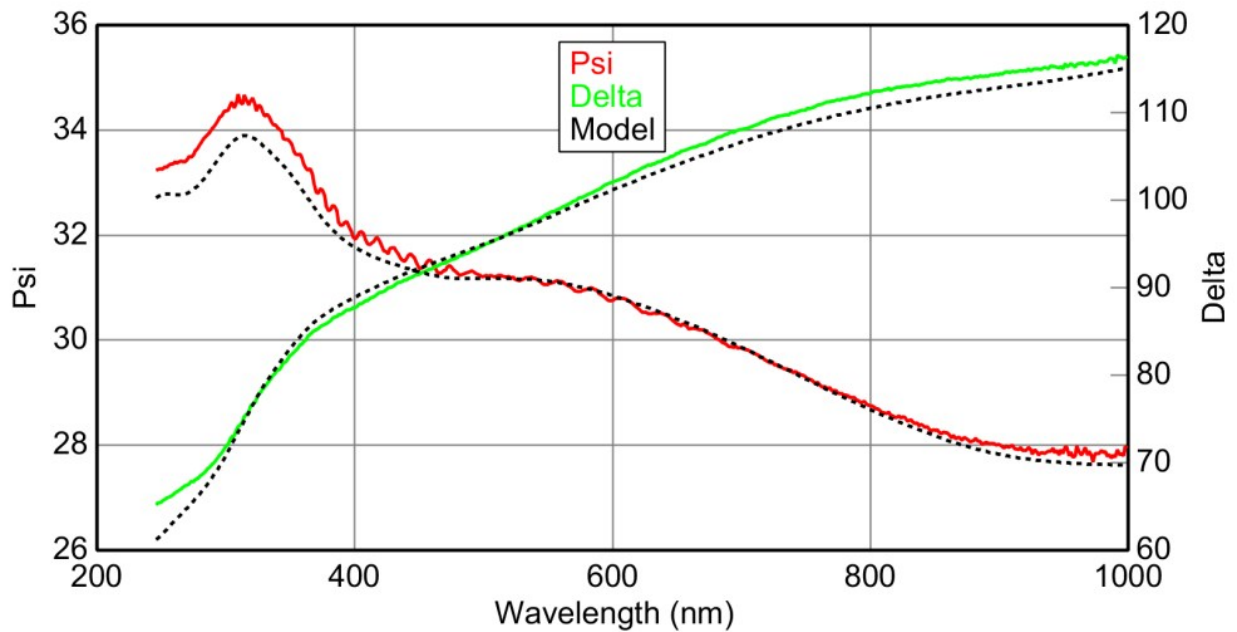

Figure S13 Ellipsometry data as well as the BEMA modelling for l-PPEGMEMA/alginate multilayered film

## Fit Results

MSE = 63.300

Thickness # 2 =  $48.87 \pm 0.059$  nm

## Optical Model

- Layer # 2 = Cauchy Thickness # 2 = 48.87 nm (fit)  
A = 1.500 B = 0.00500 C = 0.0000

+ **Urbach Absorption Parameters**

Layer # 1 = SiO2\_JAW Thickness # 1 = 25.00 nm

+ Substrate = B-Spline

## Experimental and Model Generated Data Fits

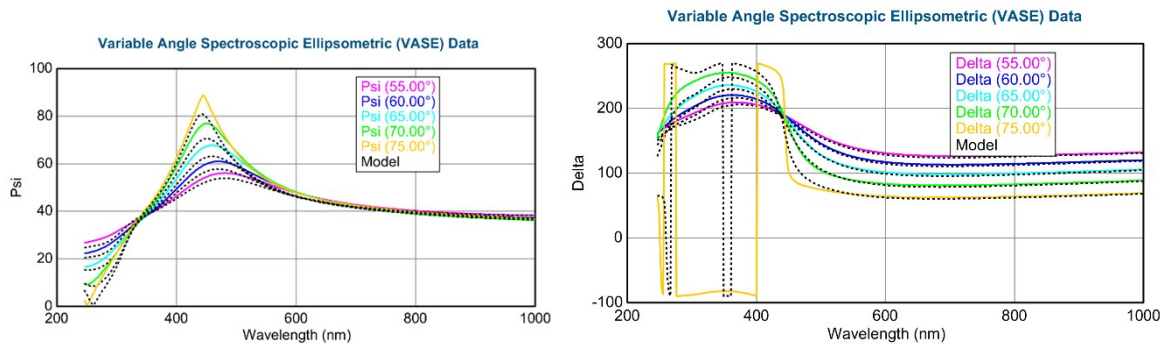

**Figure S14** Ellipsometry data as well as the Cauchy modelling for dry s-PPEGMEMMA/alginate multilayered film in air

## Fit Results

MSE = 97.154

Thickness # 2 =  $29.37 \pm 0.086$  nm

## Optical Model

- Layer # 2 = Cauchy Thickness # 2 = 29.37 nm (fit)  
A = 1.500 B = 0.00500 C = 0.0000

+ **Urbach Absorption Parameters**

Layer # 1 = SiO2\_JAW Thickness # 1 = 25.00 nm

+ Substrate = B-Spline

## Experimental and Model Generated Data Fits

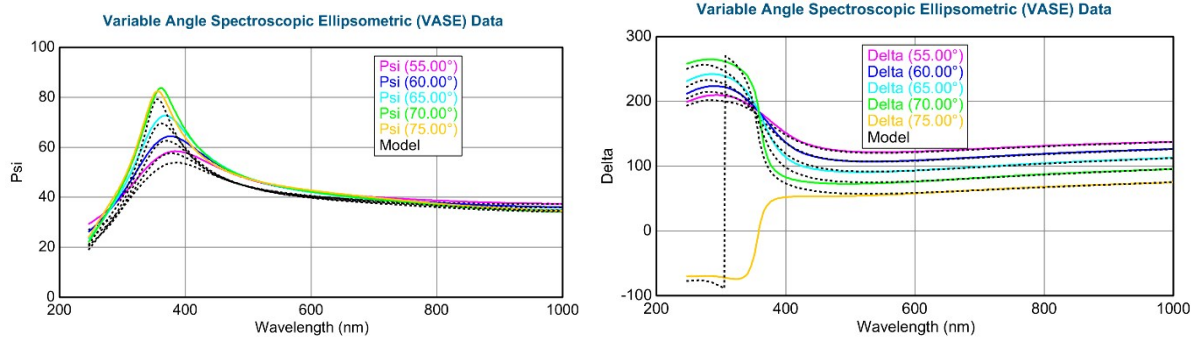

Figure S15 Ellipsometry data as well as the Cauchy modelling for dry m-PPEGMEMMA/alginate multilayered film in air



## Fit Results

MSE = 43.426

Thickness # 2 =  $17.58 \pm 0.029$  nm

## Optical Model

- Layer # 2 = Cauchy Thickness # 2 = 17.58 nm (fit)  
A = 1.500 B = 0.00500 C = 0.0000

+ **Urbach Absorption Parameters**

Layer # 1 = SiO2\_JAW Thickness # 1 = 25.00 nm

+ Substrate = B-Spline

## Experimental and Model Generated Data Fits

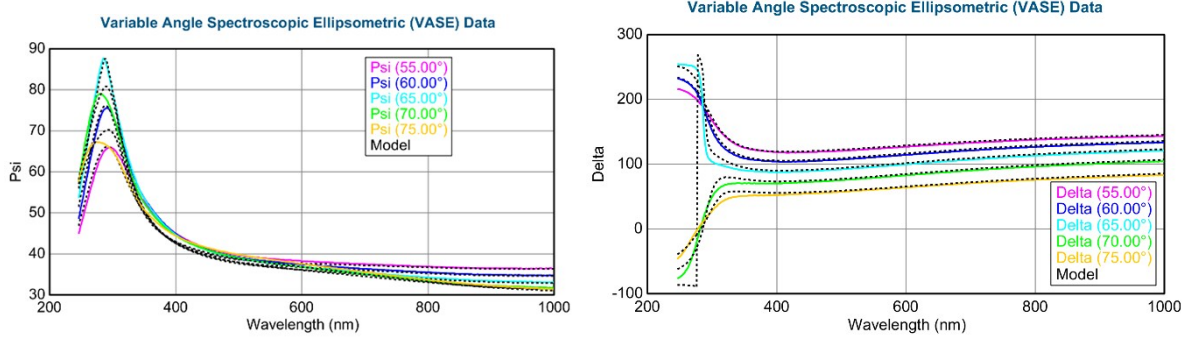

Figure S16 Ellipsometry data as well as the Cauchy modelling for dry I-PPEGMEMMA/alginate multilayered film in air

## S4 PPEGMEMA/alginate Multilayered Film Stability Before Glutaraldehyde Crosslinking

The pH stability of the m-PPEGMEMA/alginate multilayered film before crosslinking of glutaraldehyde was examined by flushing a pH 8 buffer over the prepared film. As is shown in Figure S17, an immediate disassembly of the film was observed, evidenced by a drastic decrease in frequency and dissipation shifts.

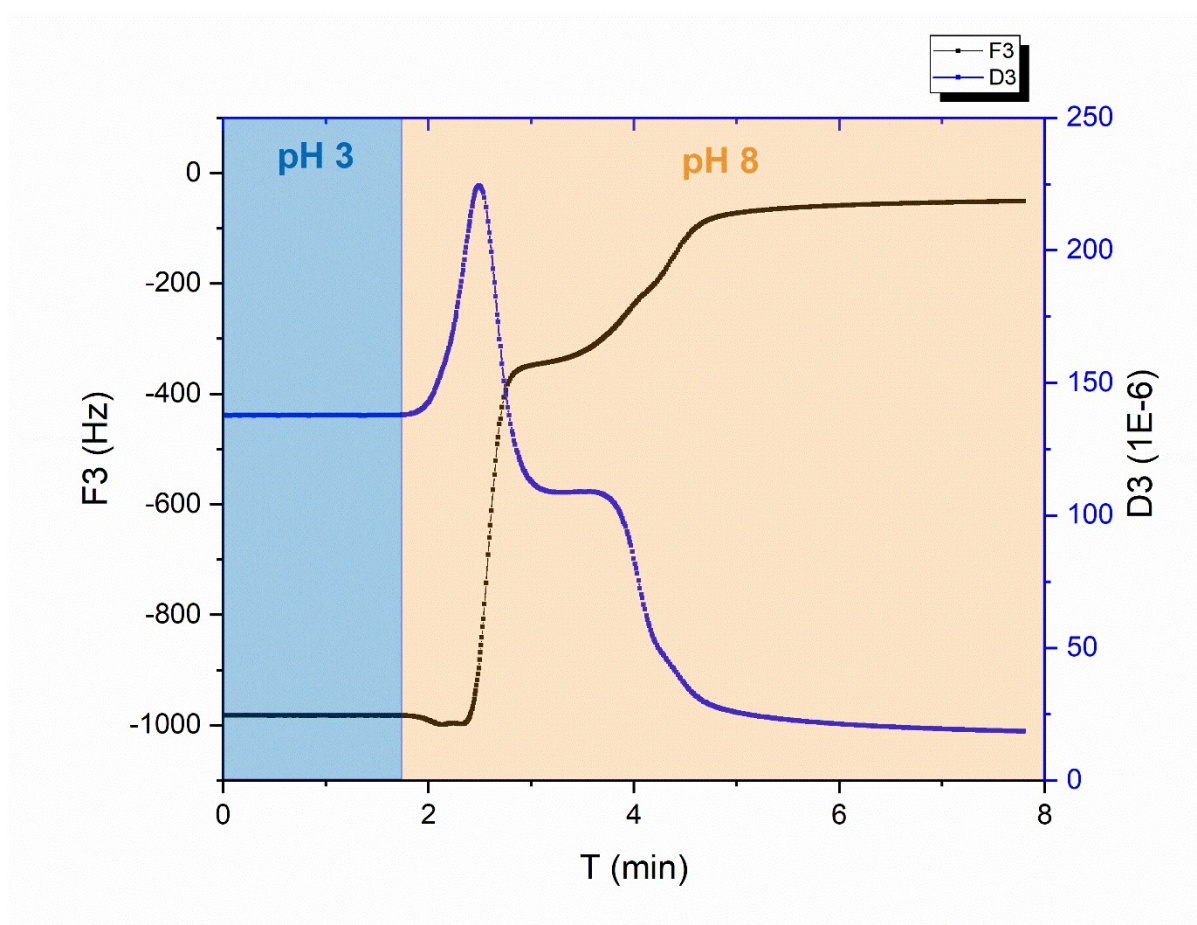

Figure S17 QCM-D Frequency and dissipation shifts after inflow of pH 8 carbonate buffer before crosslinking of glutaraldehyde
